# Supplementary material
Source: PubMed Central journal article supplement (PMC4078282)
Supplement: amiajnl-2013-002370-s1.pdf [file amiajnl-2013-002370-s1.pdf]

## Data Governance Institute

### 10 Universal Components of a Data Governance Program

#### Data Governance Institute Data Governance Framework

[http://www.datagovernance.com/dgi\\_framework.pdf](http://www.datagovernance.com/dgi_framework.pdf)

#### Rules and Rules of Engagement

1. Mission and Vision- mission: specific purpose; vision: future desired state
  - a. Defining rules
  - b. Provides ongoing services
  - c. Resolves conflicts
2. Goals, Governance metrics/success measures, funding strategies- how to get to the desired future state
3. Data Rules and definitions- Standards, policies, data definitions
4. Decision Rights- Who gets to make the decisions, when, and using what process (before decisions are made)
5. Accountabilities- Who ensures compliance, etc- cross functional alignment of different departments
6. Controls- How to deal with risk of data breach- preventive, detective, and corrective

#### People and Organizational Bodies

7. Data Stakeholders- Can include groups who create data, use data, set rules for data
8. A Data Governance Office- facilitates and supports governance activities .  
Collects metrics and success measures and reports of them to stakeholders
9. Data Stewards- set of data stakeholders who make data-related decisions; set policy and specify standards

#### Processes

10. Proactive, Reactive, and ongoing Data Governance processes- methods used to govern data; processes should be standardized, documented, and repeatable
